# Supplementary material
Source: PubMed Central journal article supplement (PMC3883930)
Supplement: NIHMS528225-supplement-01.pdf [file NIHMS528225-supplement-01.pdf]

**Table 1 supplement: Clinical features of affected cases**

|              | <b>UP IV:2</b>                                                           | <b>UP IV:3</b>                                                           |
|--------------|--------------------------------------------------------------------------|--------------------------------------------------------------------------|
| Intelligence | Normal                                                                   | Normal                                                                   |
| Height       | Short Stature (152 cm)                                                   | Short Stature (159 cm)                                                   |
| Head         | -                                                                        | Brachycephaly                                                            |
|              | Curly hair                                                               | Curly hair                                                               |
| Neck         | Webbed neck                                                              | Webbed neck                                                              |
|              | Low posterior hairline                                                   | Low posterior hairline                                                   |
| Face         | Facial asymmetry                                                         | Facial asymmetry                                                         |
|              | Decreased facial expression                                              | Decreased facial expression                                              |
|              | Mild micrognathia                                                        | Mild micrognathia                                                        |
| Eyes         | Ophthalmoplegia*                                                         | Ophthalmoplegia*                                                         |
|              | Down-slanting palpebral fissures                                         | Down-slanting palpebral fissures                                         |
|              | Epicanthal folds (right)                                                 | -                                                                        |
|              | Ptosis (right)                                                           | -                                                                        |
|              | Compound myopic astigmatism<br>OD: -3.0 -4.0 X 180, OS: -2.0 -4.50 X 180 | Compound myopic astigmatism<br>OD: -4.75 -3.75 X 75, OS: -2.5 -7.25 X 80 |
|              | Arched eyebrows                                                          | Arched eyebrows                                                          |
| Nose         | Prominent nasolabial folds                                               | Prominent nasolabial folds                                               |
|              | Bulbous nose                                                             | Bulbous nose                                                             |
| Mouth        | Small mouth                                                              | Small mouth                                                              |
|              | Small oral opening                                                       | Small oral opening                                                       |
|              | High arched palate                                                       | High arched palate                                                       |
|              | -                                                                        | Irregular teeth                                                          |
| Ears         | -                                                                        | Posteriorly angulated ears                                               |
| Spine        | Neck contracture                                                         | Neck contracture                                                         |
|              | Scoliosis (left)                                                         | Scoliosis (left)                                                         |
|              | Scapular winging                                                         | Mild Scapular winging                                                    |
| Thorax       | Thoracic hypokyphosis                                                    | Thoracic hypokyphosis                                                    |
| Limbs        | Patellar hypoplasia (bilaterally)                                        | Patellar hypoplasia (left)                                               |
|              | Limited flexion of knee                                                  | Limited flexion of knee                                                  |
|              | Limited abduction of left shoulder                                       | -                                                                        |
| Hands        | Limited abduction of wrists                                              | Limited extension of wrists                                              |

|        | Camptodactyly                          | Camptodactyly                          |
|--------|----------------------------------------|----------------------------------------|
| Feet   | Pes cavus (right)                      | Pes cavus                              |
|        | -                                      | Hallux valgus                          |
| Muscle | Decreased muscle mass<br>(lower limbs) | Decreased muscle mass<br>(lower limbs) |

#### Investigations

|                       |                                       |           |
|-----------------------|---------------------------------------|-----------|
| Hand X-ray            | Coalition between scaphoid and hamate | No fusion |
| MR biopsy             | Fibrosis                              | Fibrosis  |
| Brain and orbital MRI | Normal                                | Normal    |
| EMG                   | Normal                                | Normal    |
| Nerve conduction      | Normal                                | Normal    |
| ERG                   | Normal                                | Normal    |

MR denotes medial rectus. MRI denotes magnetic resonance imaging. EMG denotes electromyography. ERG denotes electroretinography.

\*IV:2 underwent medial rectus muscle resection (7mm) and lateral rectus recession (6mm). IV:3 underwent bilateral lateral rectus recessions (11mm).
